# Supplementary material for: Insitu grown graphitic carbon/Fe2O3/carbon nanofiber composites for high performance freestanding anodes in Li-ion batteries
Source: Royal Society of Chemistry journal article supplement (doi:10.1039/c4ra00152d), 2014-01-01
Supplement: c4ra00152d1.pdf [file c4ra00152d1.pdf]

## Electronic Supplementary Information (ESI)

### ***In situ* grown graphitic carbon/Fe<sub>2</sub>O<sub>3</sub>/carbon nanofiber composites for high performance freestanding anodes in Li-ion batteries**

Biao Zhang, Zheng-Long Xu and Jang-Kyo Kim\*

Department of Mechanical and Aerospace Engineering, The Hong Kong University of Science and Technology, Clear Water Bay, Kowloon, Hong Kong.

Email: mejkkim@ust.hk

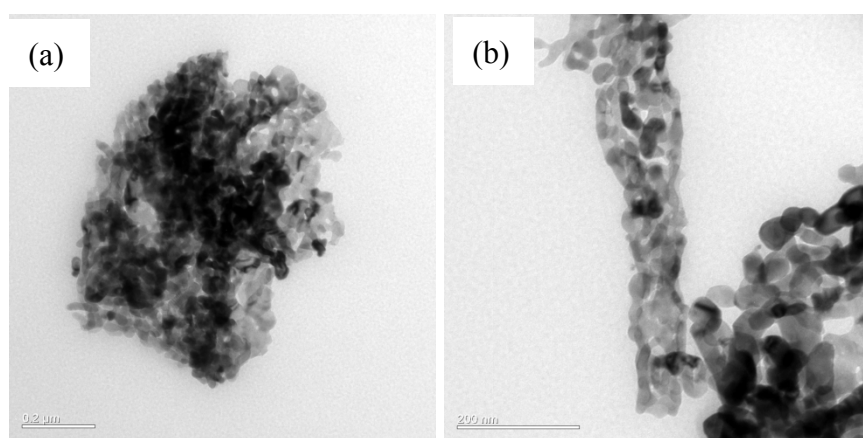

Fig. S1. TEM images of Fe<sub>2</sub>O<sub>3</sub> nanoparticles obtained after annealing C/Fe<sub>2</sub>O<sub>3</sub>/CNF composites at 500 °C for 2h in air.
